# Supplementary material
Source: bioRxiv or medRxiv preprint supplement (https://www.biorxiv.org/highwire/filestream/3441/field_highwire_adjunct_files/0/013631-1.pdf)

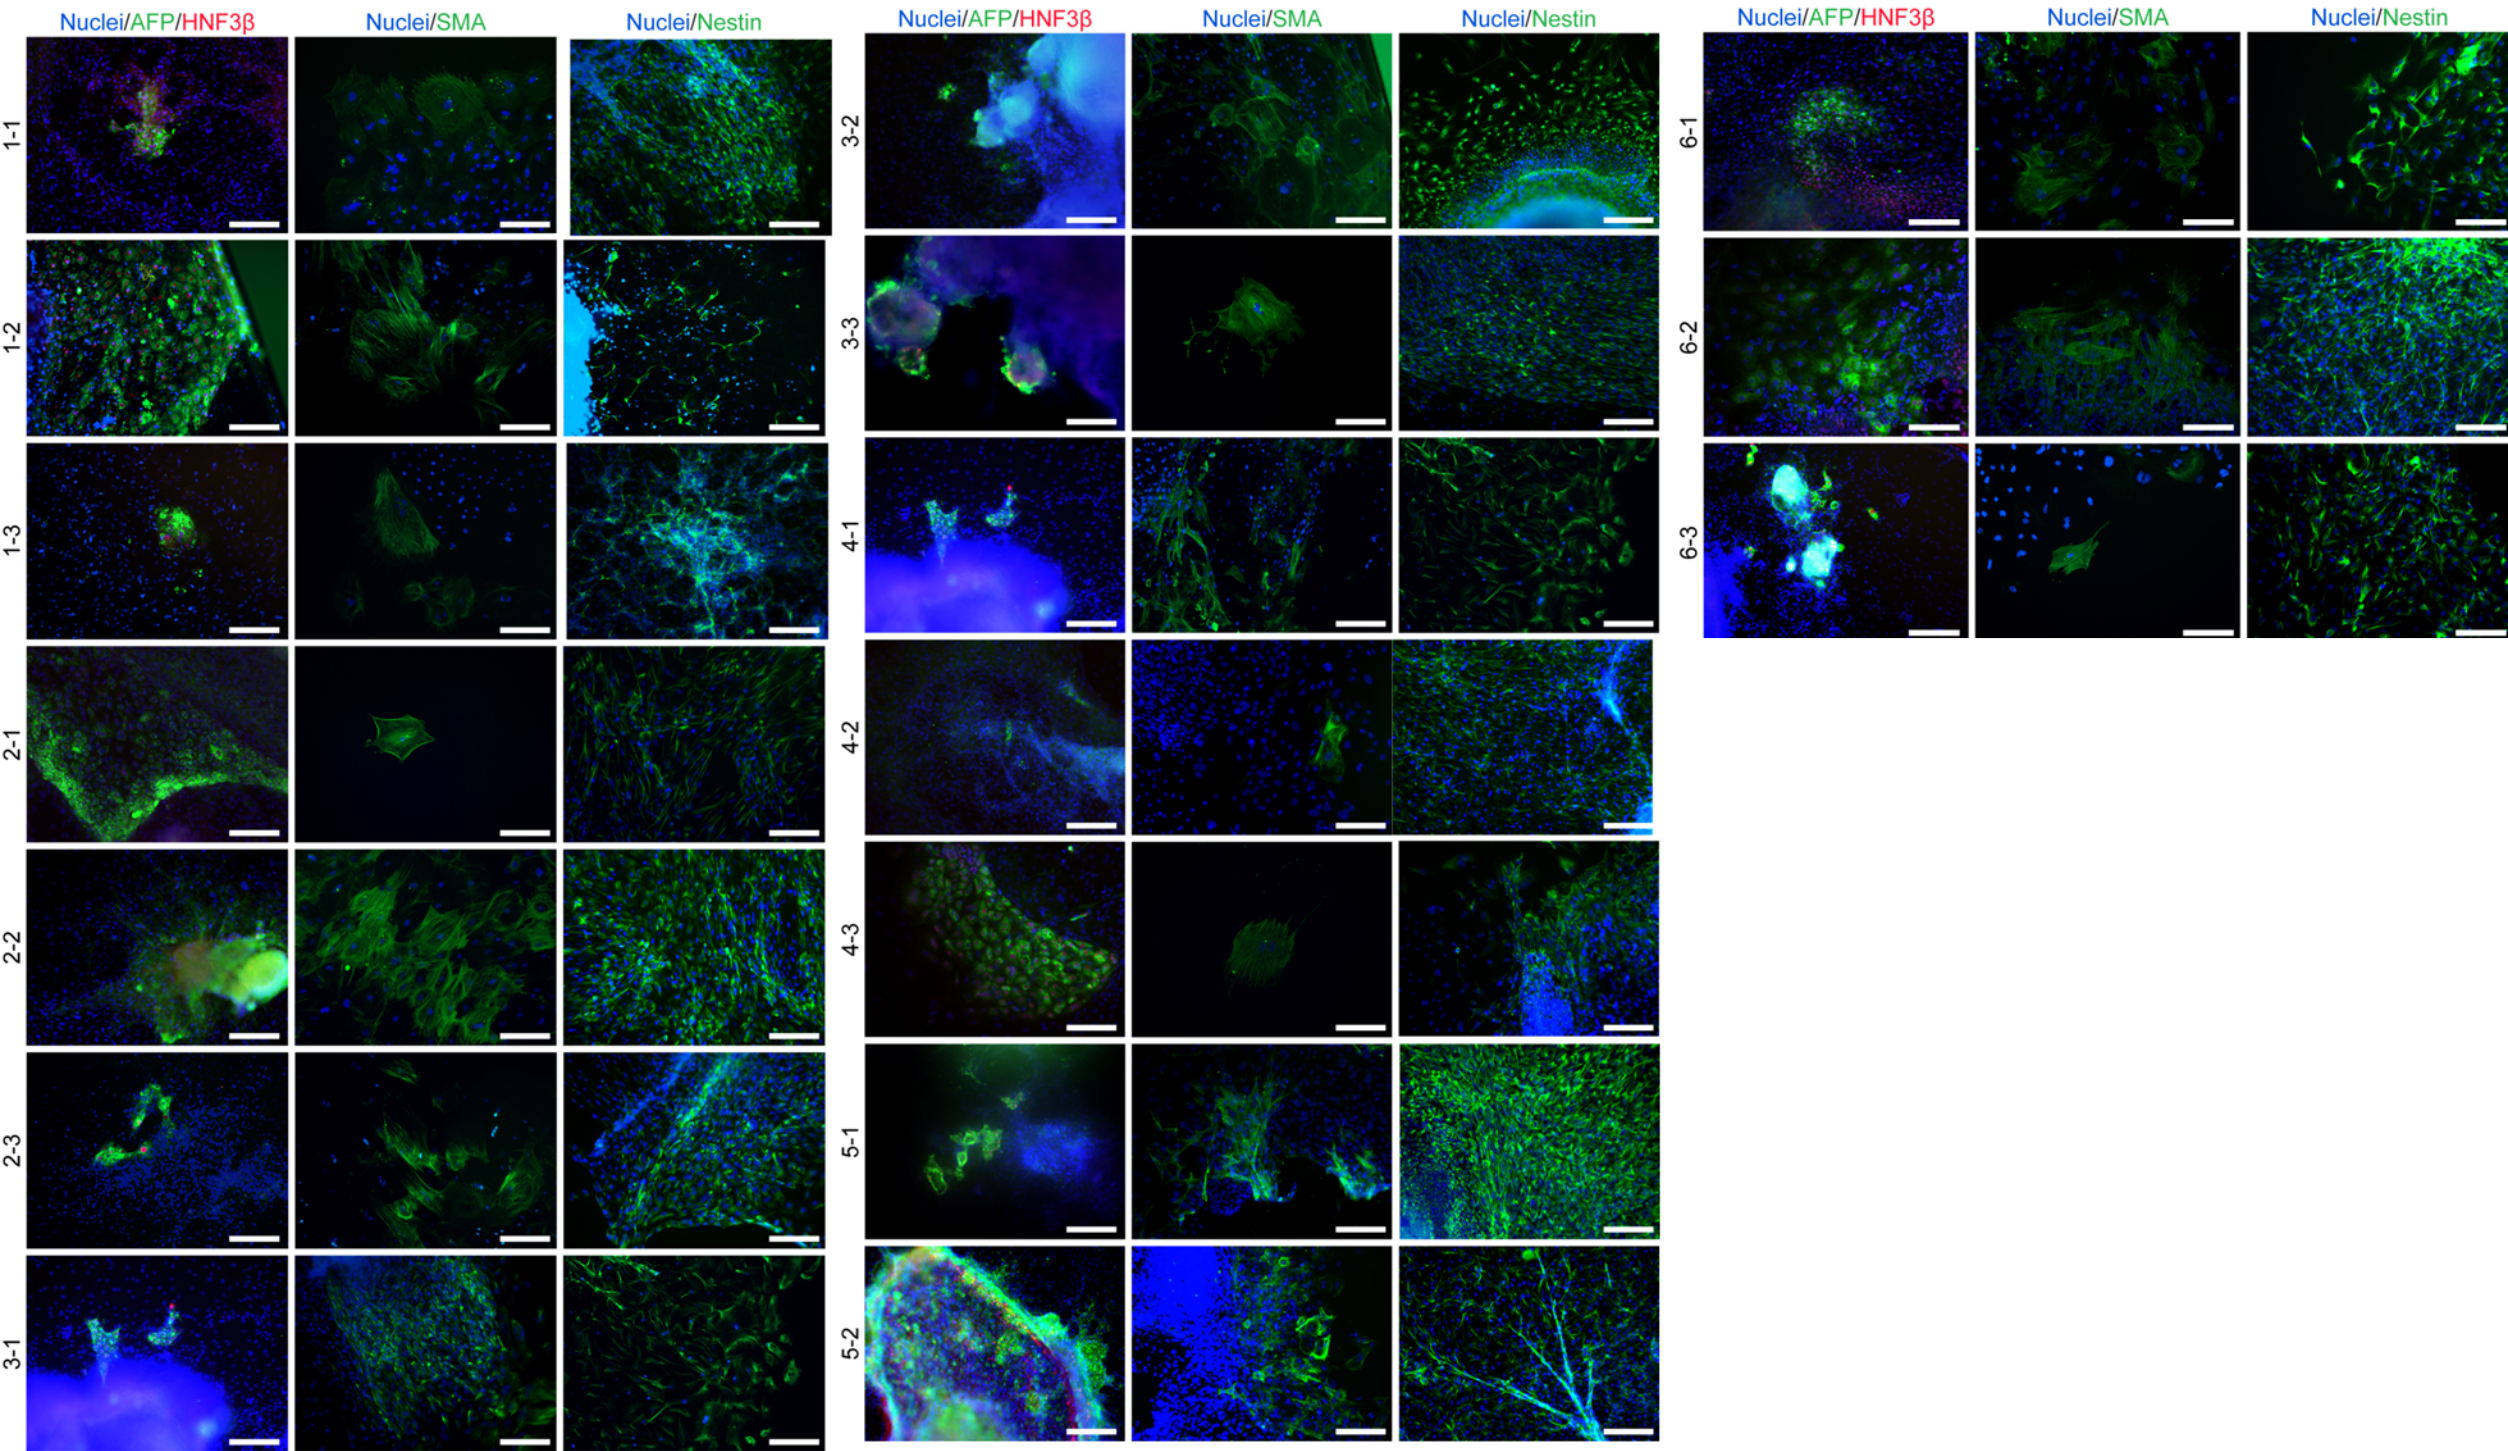

Supplement: Supplementary file [file 013631-1.pdf]
